# Supplementary material
Source: PubMed Central journal article supplement (PMC4078001)
Supplement: NIHMS588026-supplement-1.pdf [file NIHMS588026-supplement-1.pdf]

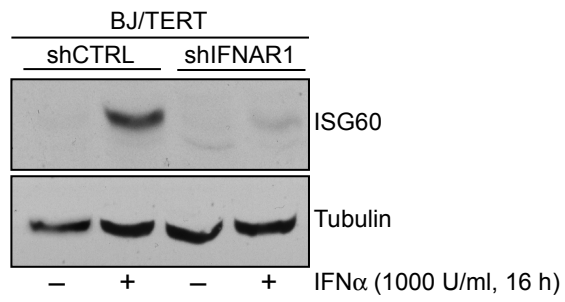

**Supplementary Figure 1: Loss of IFN signaling in BJ/TERT shIFNAR1 expressing cells.**

BJ/TERT cells stably expressing either control (shCTRL) or IFNAR1-targeted shRNA (shIFNAR1) were treated with IFN $\alpha$  as indicated followed by immunoblotting with indicated antibodies.

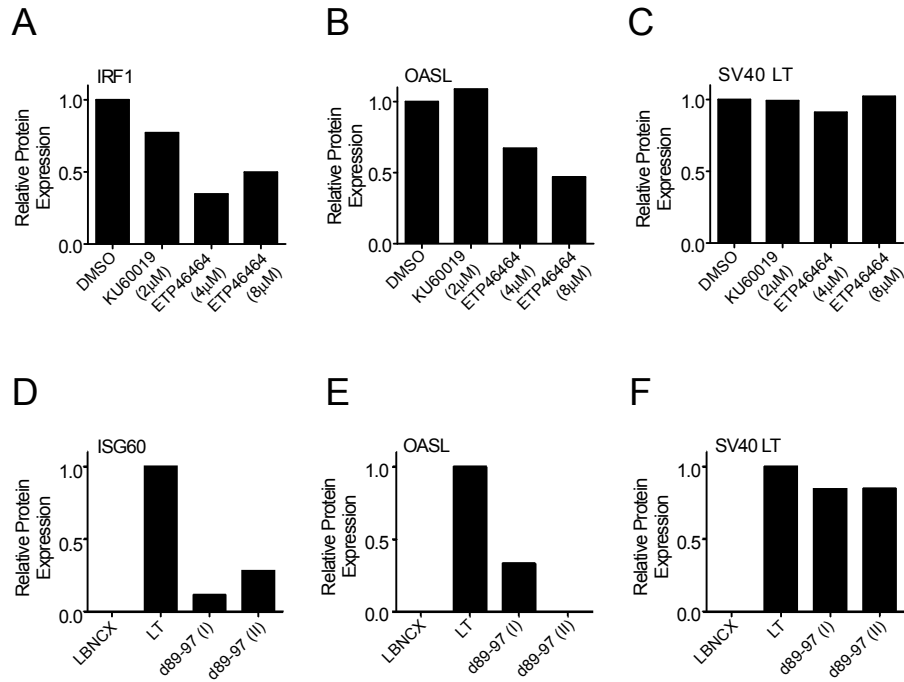

**Supplementary Figure 2: Densitometric Analysis of protein expression in Figure. 6**

(A-C) Densitometric analysis was done (Fig. 6A) for protein expression using Image J. Band intensity for IRF1, OASL, and SV40 LT was measured and normalized to Actin band intensity. Ratios were then expressed relative to DMSO treated cells (value 1). (D-F) Densitometric analysis was done (Fig. 6D) in the same way as above. Band intensity for ISG60 (D) OASL (E) and SV40LT (F) was measured and normalized to Actin band intensity. Ratios were then expressed relative to LT expressing cells (value 1).

A

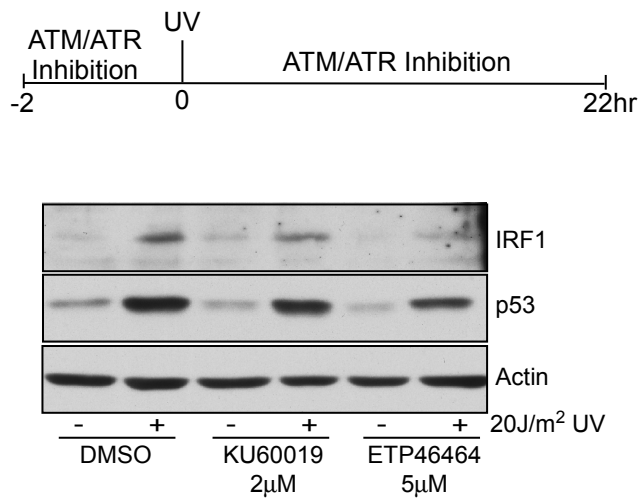

B

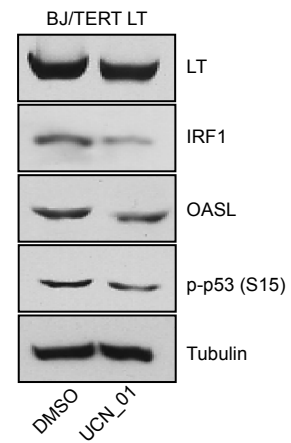

**Supplementary Figure 3: DNA-damage induction of IRF1 requires ATR and Chk-1 kinase activity**

(A) Induction of IRF1 expression by UV damage. BJ/TERT cells were treated with KU60019 or ETP46464 for 2hrs prior to UV irradiation (20J/m<sup>2</sup>). Cells were kept under inhibitor treatment for an additional 22 hrs. Lysates were prepared and probed with antibodies against IRF1, p53, and actin.

(B) Requirement for Chk1 kinase activity in LT-mediated IRF1 induction. BJ/TERT LT cells were treated with 100nM UCN-01 for 24 hrs. Lysates were prepared and probed with antibodies against IRF1, OASL, phospho-p53 (S15), and actin.
